# Supplementary material for: Synthesis and Aggregation Behavior of Temperature- and pH-Responsive Glycopolymers as Sugar-Displaying Conjugates
Source: MDPI journal article supplement (doi:10.3390/polym12040956), 2020-04-20
Supplement: s1 [file s1]

## **Supplementary Information**

### **Synthesis and Aggregation Behavior of Temperature- and pH-responsive Glycopolymers as Sugar-displaying Conjugates**

Sotaro Tsuji, Tomohiro Aoki, Shunsuke Ushio, and Tomonari Tanaka\*

Department of Biobased Materials Science, Graduate School of Science and Technology,  
Kyoto Institute of Technology, Matsugasaki, Sakyo-ku, Kyoto 606-8585, Japan.

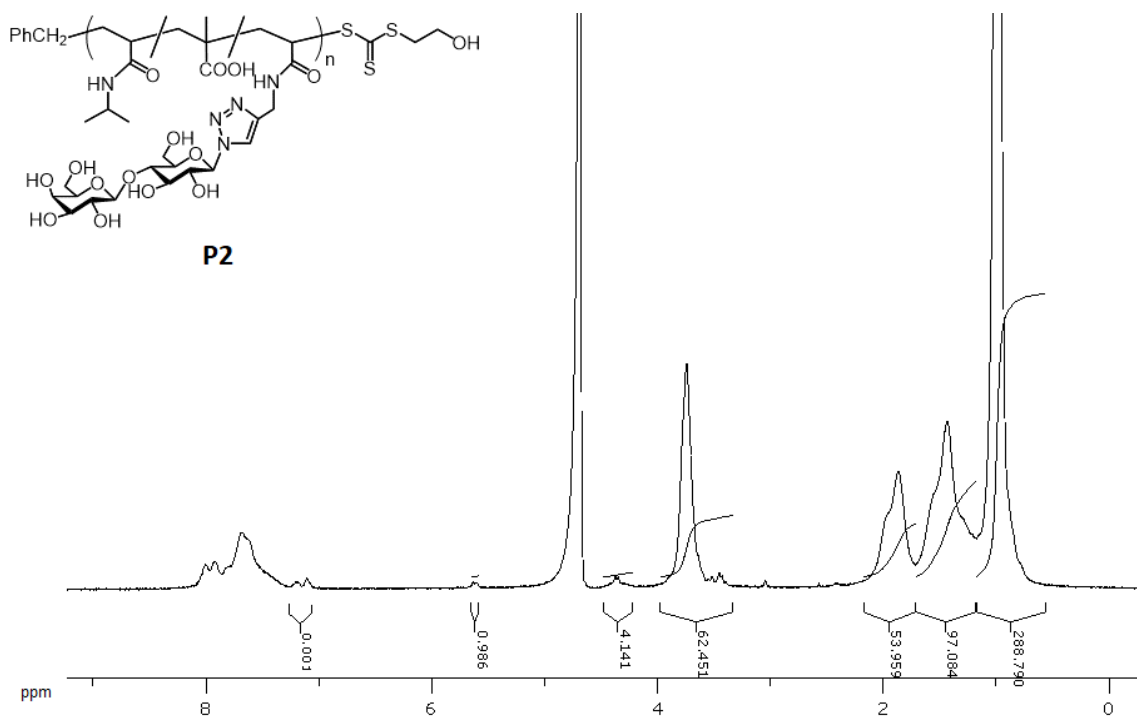

**Figure S1**  $^1\text{H}$  NMR spectrum of **P2** in  $\text{D}_2\text{O}$ .

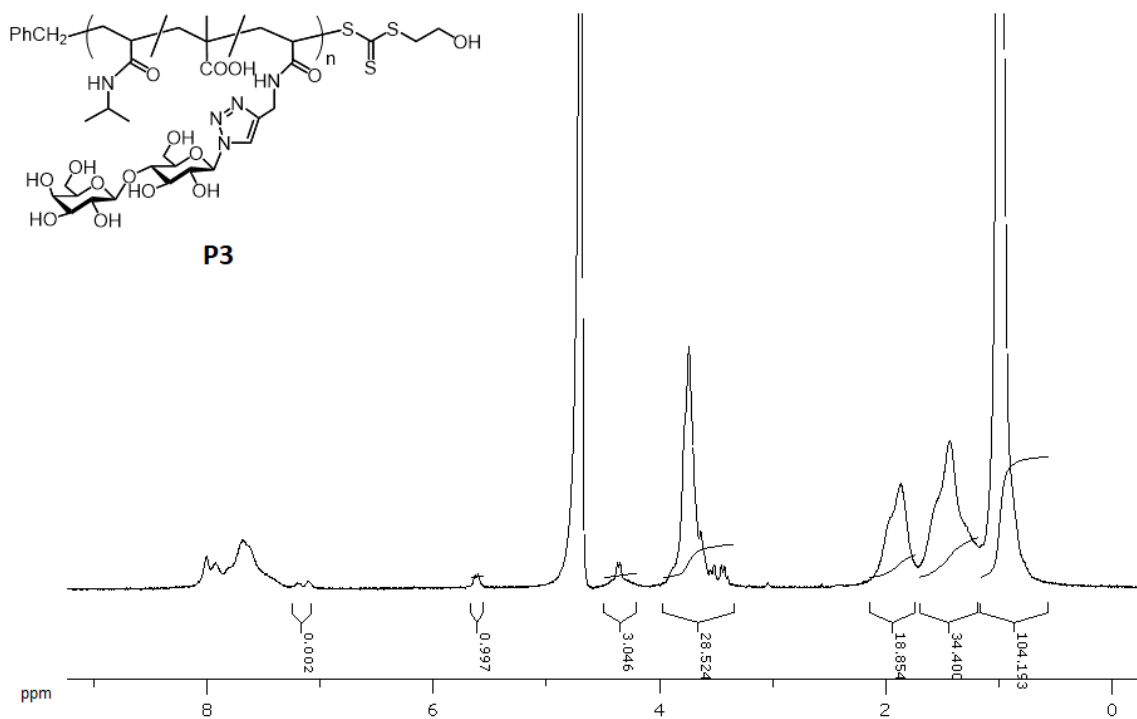

**Figure S2**  $^1\text{H}$  NMR spectrum of **P3** in  $\text{D}_2\text{O}$ .
